# Supplementary material
Source: MDPI journal article supplement (https://www.mdpi.com/2073-4344/13/3/482)
Supplement: s1 [file s1]

## Supplementary Information

### 1. Catalyst Synthesis:

Prices for the two precursors:

$\text{RuCl}_3 \cdot x\text{H}_2\text{O}$ : 10 g, 518 €, last checked 02.02.2023 (Alfa Aesar)

$\text{N}_4\text{O}_{10}\text{Ru}$ : 5 g, 412 €, last checked 02.02.2023 (Alfa Aesar)

In preparation:

A 4.7 wt% solutions of  $\text{RuCl}_3 \cdot x\text{H}_2\text{O}$  was prepared, by dissolving the appropriate amount of the precursor in hot water. The 4.7 wt% solution of  $\text{Ru}(\text{NO})(\text{NO}_3)$  was used as received from the purchaser.  $\gamma\text{-Al}_2\text{O}_3$  was heated under a static air environment to 500 °C in 1 h and the temperature was hold for 4 h. After cooling down the so received  $\gamma\text{-Al}_2\text{O}_3$  was used in wet impregnation step.

Wet Impregnation:

The appropriate amount of  $\gamma\text{-Al}_2\text{O}_3$  was suspended in 70 g of distilled Water. The round bottom flask was put in a pre heated oil bath at 70 °C. The appropriate amount of the 4.7 wt% solutions of the precursors in Water ( $\text{RuCl}_3 \cdot x\text{H}_2\text{O}$ ) and dilute nitric acid ( $\text{Ru}(\text{NO})(\text{NO}_3)$ ) were added. The so received dark coloured suspension was stirred at 70 °C over night. The hot solution was put into a rotary evaporator and the water was removed under reduced pressure (200 RPM, 42 mbar, 50 °C Water bath temperature). For complete dryness the so received pre-catalyst lumps where dried in a pre-heated oven at 120 °C. The lumps received where finely grounded. The so received powders (-i. ending) where halved. First half of the batches was directly reduced under a dilute  $\text{H}_2$  (7-10%  $\text{H}_2$  in  $\text{N}_2$ ) flow (-ir. ending). The temperature program was put at 450 °C, this temperature was reached after 1 h of heating. The second half of the batches was calcined in static air at 600 °C, this temperature (-ic. ending) was reached with a heating rate of 10K/min. The so received powders where further reduced under same conditions as described before.

### 2. Correlation between $\text{H}_2$ uptake and metal loading (Temperature-programmed reduction)

Table S1: Comparison of  $\text{H}_2$  uptake and metal loading.

| Catalyst         | $\text{H}_2$ uptake | loading of metal responsible for $\text{H}_2$ uptake |
|------------------|---------------------|------------------------------------------------------|
| Ru-NO-1-ic.      | 70                  | 0.283 (Ru)                                           |
| Ru-NO-3-ic.      | 150                 | 1.05 (Ru)                                            |
| Ru-NO-5-ic.      | 290                 | 1.604 (Ru)                                           |
| RuNi-NO-ic. (LT) | 230                 | 2.129 (Ru)                                           |
| RuNi-NO-ic. (HT) | 500                 | 10.34 (Ni)                                           |
| Ru-Cl-1-ic.      | 70                  | 0.43 (Ru)                                            |
| Ru-Cl-3-ic.      | 210                 | 1.443 (Ru)                                           |
| Ru-Cl-5-ic.      | 320                 | 2.576 (Ru)                                           |
| RuNi-Cl-ic. (LT) | 170                 | 1.19 (Ru)                                            |
| RuNi-Cl-ic. (HT) | 500                 | 10.78 (Ni)                                           |

### 3. Calculations of H<sub>2</sub> uptakes:

Altamira AMI300 After measuring the thermograms the measurement systems calibrates itself with the injection of a specific amount of analyte gas. The integration of this 5 calibration signals gives an average area and therefore a correlation between amount of gas and area. With this correlation the area of the Thermograms can be multiplied to get the reactant gas uptake.

$$V = \frac{V_L \cdot \left( \frac{\%v}{100\%} \right)}{A_{Kal}} \cdot A_T \quad (1)$$

$$U = \frac{V \cdot p}{R \cdot T \cdot m_{cat}} \quad (2)$$

Adsorbed analytical gas [ $\mu$ l]: V

H<sub>2</sub> uptake [ $\mu$ mol·g<sup>-1</sup>] : U

Volume of analyte gas (Loop Volume) [ $\mu$ l]: V<sub>L</sub>

Average of all 5 calibration signals: A<sub>Kal</sub>

Area of the thermogram: A<sub>T</sub>

Amount of catalyst to be analyzed [g]: m<sub>cat</sub>

Loop Temperature [K]: T

Universal gas constant [L·atm·K<sup>-1</sup>·mol<sup>-1</sup>] : R

Pressure [atm]: p

Analytical Gas [%]: %v/v

### 4. Calculations of the productivities

After calibrating the different products within the appropriate concentration ranges, the samples from the reactors were filtrated and measured undiluted in the GC. This gave us the concentration of the compounds in that sample C<sub>x</sub> x being the product.

Productivity P<sub>x</sub> was given in mmol·l<sup>-1</sup>·g<sub>cat</sub><sup>-1</sup> and therefore calculated: P<sub>x</sub> = C<sub>x</sub> · m<sup>-1</sup><sub>cat</sub>

### 5. Correlation between particle size and MeFo productivity for the different ruthenium catalysts

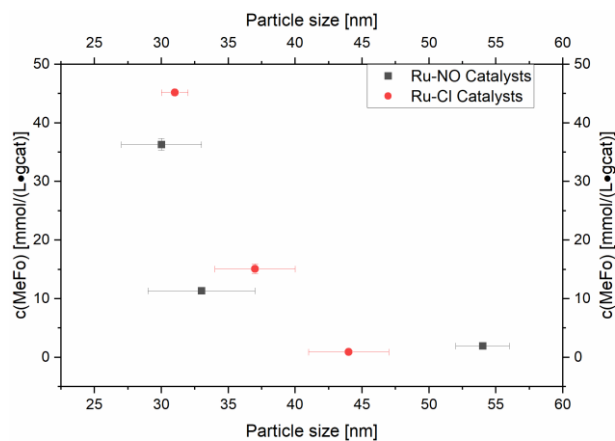

Figure S1: Comparison of particle size and MeFo productivity for the Ru-XX catalysts.

## 6. Scanning electron microscopy measurements coupled with energy dispersive x-rays

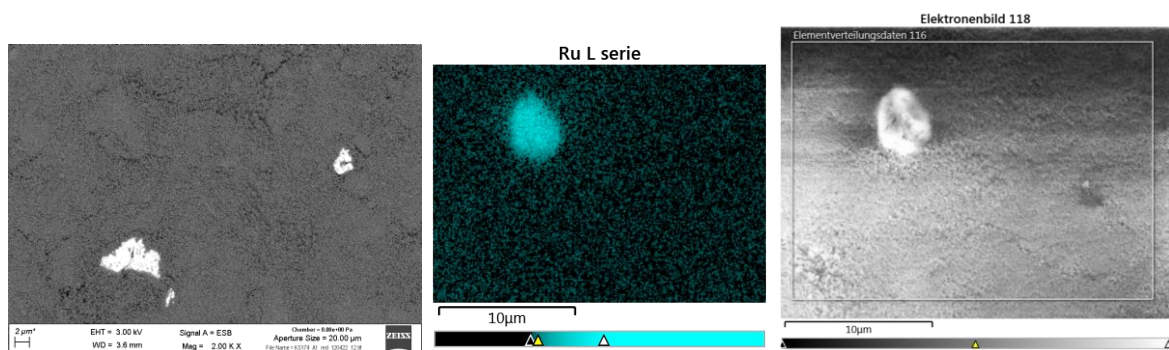

Figure S2: SEM-EDX pictures of Ru-NO-1-icr. catalyst.

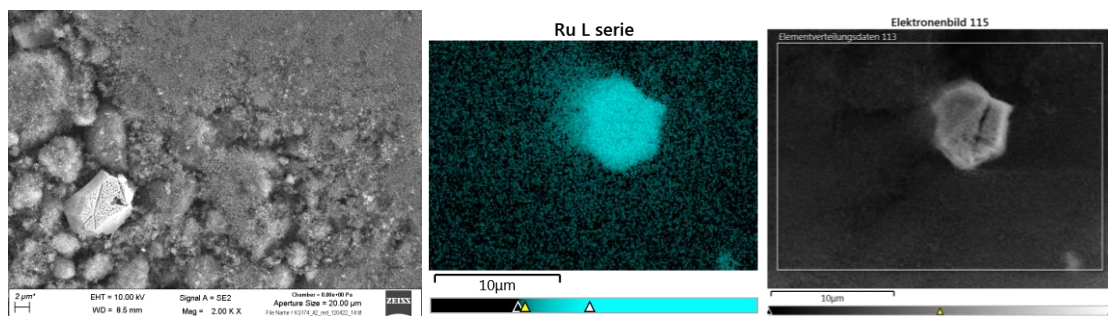

Figure S3: SEM-EDX pictures of Ru-NO-3-icr. catalyst.

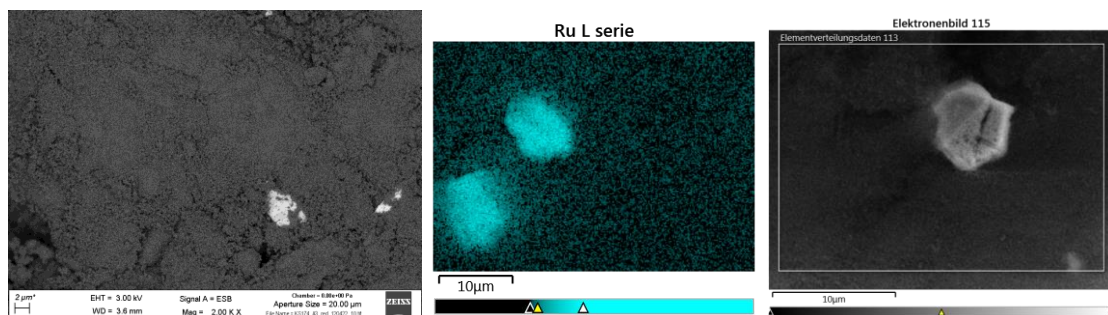

Figure S4: SEM-EDX pictures of Ru-NO-5-icr. catalyst.

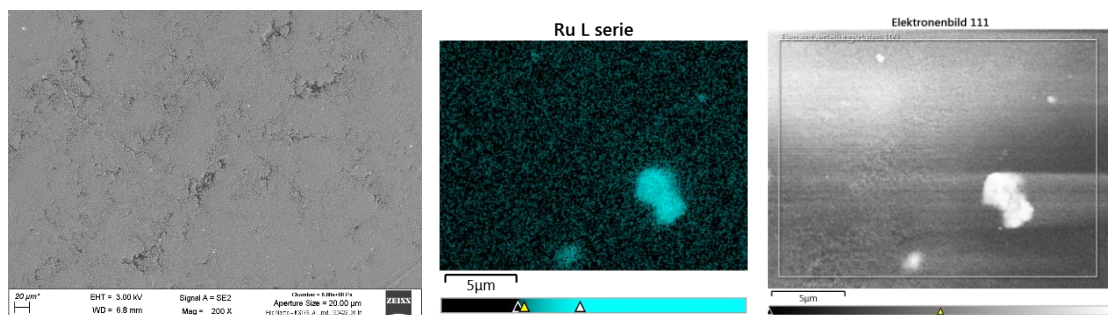

Figure S5: SEM-EDX pictures of Ru-Cl-1-icr. catalyst.

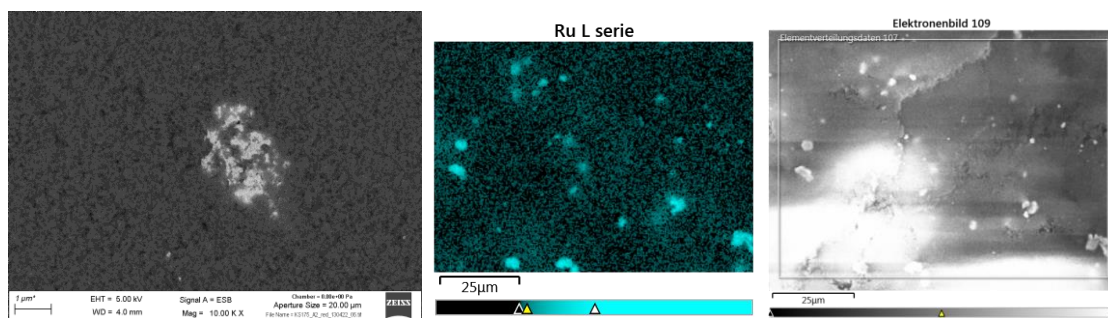

Figure S6: SEM-EDX pictures of Ru-Cl-3-icr. catalyst.

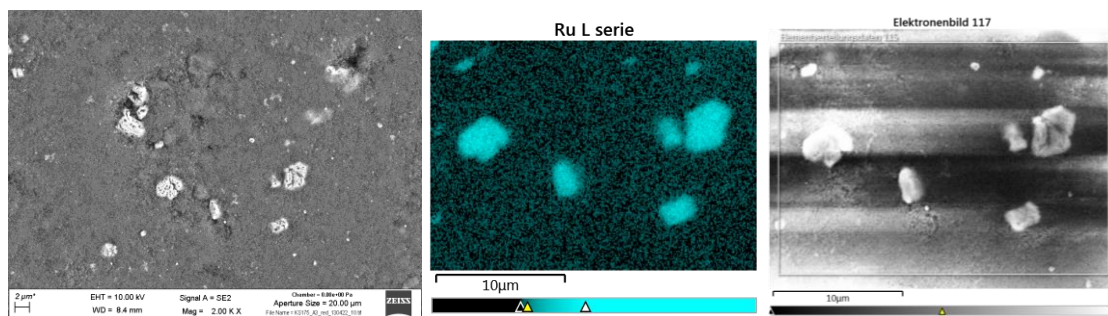

Figure S7: SEM-EDX pictures of Ru-Cl-5-icr. catalyst.

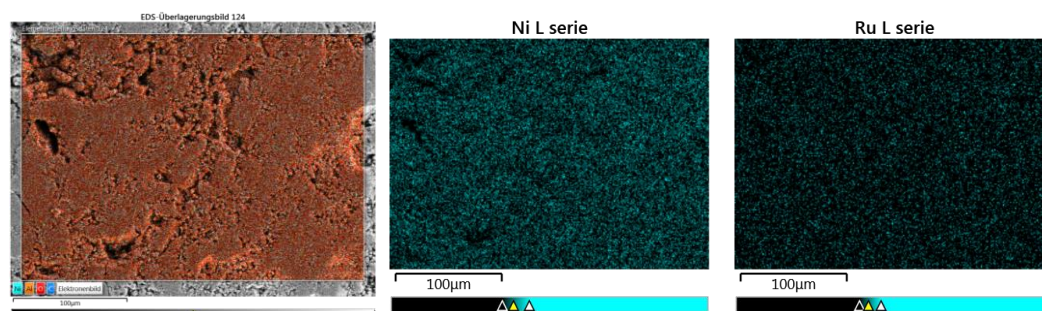

Figure S8: SEM-EDX pictures of RuNi-NO-ir. catalyst.



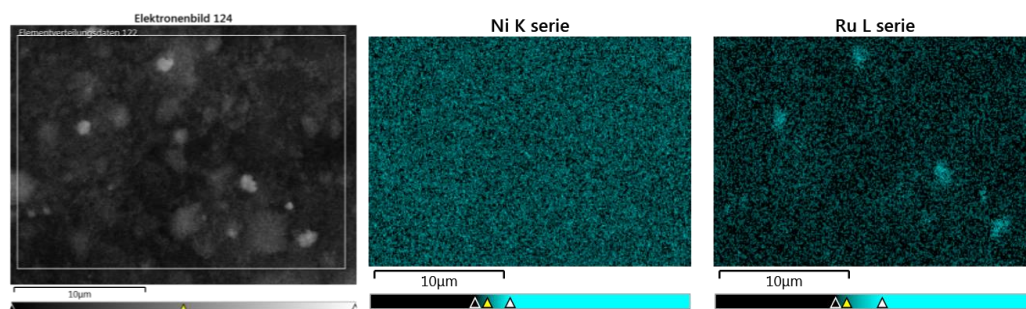

Figure S9: SEM-EDX pictures of RuNi-NO-icr. catalyst.

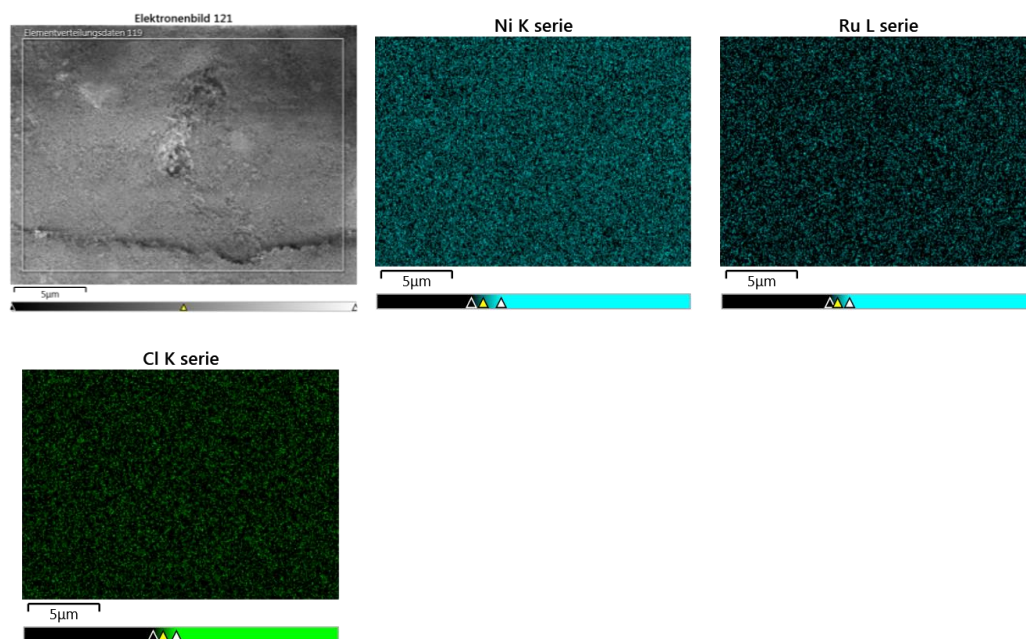

Figure S10: SEM-EDX pictures of RuNi-Cl-ir. catalyst.

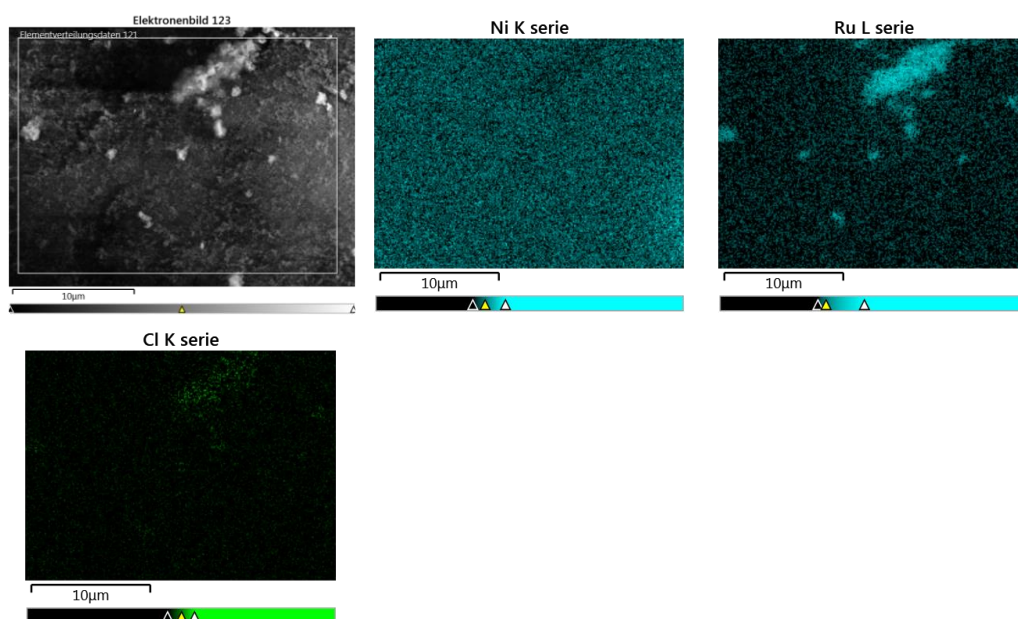

Figure S11: SEM-EDX pictures of RuNi-Cl-icr. catalyst.

## 7. Catalyst testing & analytics

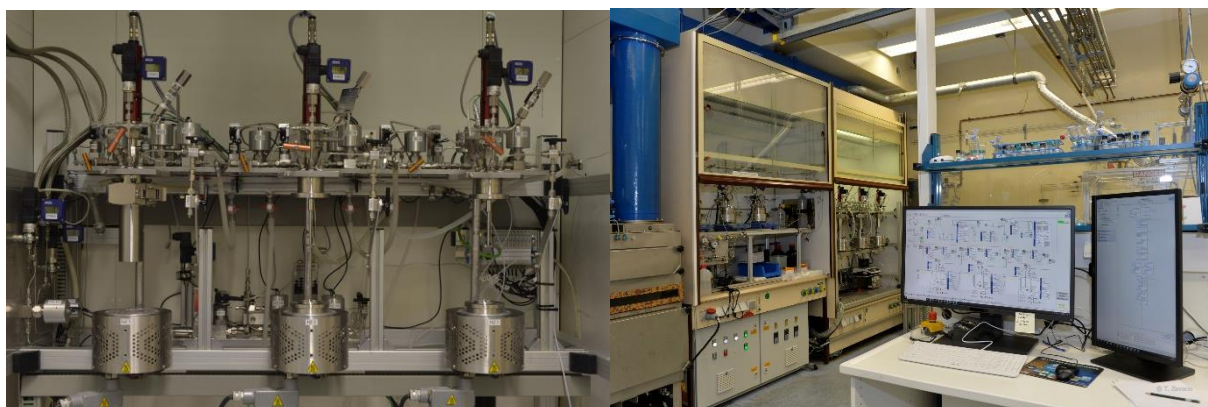

Figure S12: Pictures of the PASCAR plant used for all catalyst screening experiments and for parameter studies.

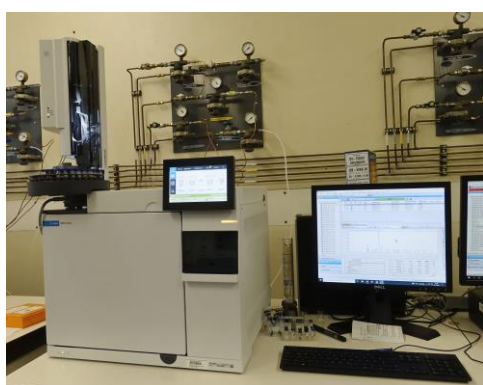

Figure S13: Picture of the gas chromatograph used for the off-line analysis of samples.

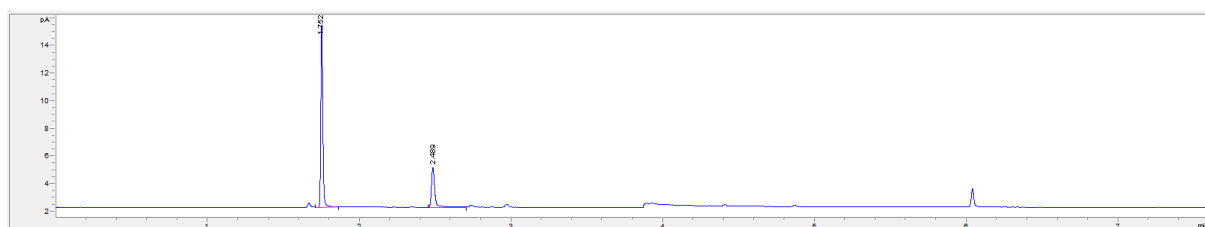

Figure S14: Exemplary chromatogram of a measurement of the CO-Hydrogenation in methanolic media after 24 h with the use of a Ru-NO-3 catalyst. The signal at the retention time of 1.752 min corresponds to Dimethylether, the signal at 2.489 min to Methylformate. The methanol signal is cut out by the use of a Deans Switch during 3.3 to 3.8 min.

### GC Method:

=====

Agilent 8890

=====

### GC

#### GC Summary

Run Time 7.6 min

Post Run Time 0 min

**Oven**

|                    |           |
|--------------------|-----------|
| Equilibration Time | 0 min     |
| Max Temperature    | 240 °C    |
| (Initial)          | 40 °C     |
| Hold Time          | 2 min     |
| Post Run           | 110 °C    |
| #1 Rate            | 25 °C/min |
| #1 Value           | 180 °C    |
| #1 Hold Time       | 0 min     |

**ALS****Front Injector**

|                             |             |
|-----------------------------|-------------|
| Syringe Size                | 10 µL       |
| Injection Volume            | 1 µL        |
| Solvent A Washes (PreInj)   | 5           |
| Solvent A Washes (PostInj)  | 5           |
| Solvent A Volume            | 8 µL        |
| Sample Washes               | 1           |
| Sample Wash Volume          | 8 µL        |
| Sample Pumps                | 3           |
| Solvent Wash Draw Speed     | 150 µL/min  |
| Solvent Wash Dispense Speed | 6000 µL/min |
| Sample Wash Draw Speed      | 150 µL/min  |
| Sample Wash Dispense Speed  | 6000 µL/min |
| Injection Dispense Speed    | 6000 µL/min |
| Viscosity Delay             | 0 sec       |
| L1 Airgap                   | 0.2 µL      |

**Front SS Inlet He**

|        |           |
|--------|-----------|
| Mode   | Split     |
| Heater | On 180 °C |

|                   |                                                                   |
|-------------------|-------------------------------------------------------------------|
| Pressure          | On 0                                                              |
| Total Flow        | On 133.4 mL/min                                                   |
| Septum Purge Flow | On 3 mL/min                                                       |
| Pre-Run Flow Test | Off                                                               |
| Gas Saver         | On 20 After 2 min mL/min                                          |
| Split Ratio       | 50 :1                                                             |
| Split Flow        | 127.84 mL/min                                                     |
| Liner             | Agilent 5190-3165: 870 µL (Split, taper, wool, low pressure drop) |

### PolyArc

|             |        |
|-------------|--------|
| Temperature |        |
| Setpoint    | On     |
| (Initial)   | 450 °C |

### Column #1

|                    |                                   |
|--------------------|-----------------------------------|
| Column Information | Agilent 123-7033UI DB-WAX Ultra I |
| Temperature Range  | 20 °C—240 °C (240 °C)             |
| Dimensions         | 30 m x 320 µm x 0.5 µm            |
| In                 | Front SS Inlet He                 |
| Out                | Aux EPC 1                         |
| (Initial)          | 40 °C                             |
| Pressure           | 0                                 |
| Flow               | 2.5568 mL/min                     |
| Average Velocity   | 33.826 cm/sec                     |
| Holdup Time        | 1.4781 min                        |
| Control Mode       | Constant Flow                     |
| (Initial)          | 2.5568 mL/min                     |
| Post Run           | 1 mL/min                          |

### Column #2



|                    |                        |
|--------------------|------------------------|
| Column Information | Agilent FS, Deactivate |
| Temperature Range  | 20 °C—240 °C (240 °C)  |
| Dimensions         | 2.5 m x 250 µm x 0 µm  |
| Out                | Front Detector FID     |
| (Initial)          | 40 °C                  |
| Pressure           | 0                      |
| Flow               | 4 mL/min               |
| Average Velocity   | 122.56 cm/sec          |
| Holdup Time        | 0.033996 min           |
| Control Mode       | Constant Flow          |
| Setpoint           | On                     |
| (Initial)          | 4 mL/min               |
| Post Run           | 9.5407 mL/min          |

#### Front Detector FID

|                             |                                    |
|-----------------------------|------------------------------------|
| Makeup                      | He                                 |
| Heater                      | On 250 °C                          |
| H2 Flow                     | On 1.5 mL/min                      |
| Air Flow                    | On 350 mL/min                      |
| Makeup Flow                 | On 25 mL/min                       |
| Carrier Gas Flow Correction | Constant Makeup and Fuel FlowFlame |
| Initial Baseline Minimum    | 2 pA                               |
| Initial Baseline Maximum    | 20 pA                              |
| Initial Baseline Noise      | 0.3 pA                             |
| Final Baseline Minimum      | 2 pA                               |
| Final Baseline Maximum      | 40 pA                              |
| Final Baseline Noise        | 0.6 pA                             |
| Total Peak Area             | 100 pA*sec                         |
| Maximum Peak Height         | 3 pA                               |
| Time Window Start           | 0 min                              |
| Time Window End             | 0.5333333333 min                   |

=====

Column(s)

=====

Column Description : DB-WAX Ultra I

Inventory# : autoID-2

Model# : 123-7033UI

Manufacturer : Agilent

Diameter : 320.0 µm

Length : 30.0 m

Film thickness : 0.50 µm

Void time : 1.478 min

Maximum Temperature: 240.0 °C

Comment :

Column Description : FS, Deactivate

Inventory# : autoID-3

Model# :

Manufacturer : Agilent

Diameter : 250.0 µm

Length : 2.5 m

Film thickness : 0.00 µm

Void time : 0.034 min

Maximum Temperature: 240.0 °C

Comment :
